# Supplementary material for: EULAR recommendations for the management of familial Mediterranean fever
Source: HighWire-hosted journal article supplement (doi:10.1136/annrheumdis-2015-208690), 2016-01-23
Supplement: annrheumdis-2015-208690supp.pdf [file annrheumdis-2015-208690supp.pdf]

## **APPENDIX. Delphi participants.**

A Hospach, Germany; Alberto Martini, Italy; Avi Livneh, Israel; Berna Fidanci, Turkey; Bunyamin Kısacık, Turkey; Burak Erer, Turkey; Carine Wouters, Belgium; Consuelo Modesto, Spain; D Foell, Germany; Daniel Kastner, USA; Dogan Simsek, Turkey; Donato Rigante, Italy; Efimia Papadopoulou-Alataki, Greece; Eldad Ben-Chetrit, Israel; Eli Eisenstein, Israel; Elon Pras, Israel; Erkan Demirkaya, Turkey; Estebanez Munoz, M, Spain; Ezgi D. Batu, Turkey; Fabrizio De Benedetti, Italy; Fatma Dedeoglu, USA; Faysal Gok, Turkey; Giovanna Fabio, Italy; Helmut Wittkowski, Germany; Huri Ozdogan, Turkey; Illana Abu, Israel; Itzhak Rosner, Israel; Jordi Anton, Spain; Juan Arostegui, Spain; Karyl Barron, USA; Liliana Bezrodnik, Argentina; Linda Rossi-Semerano, France; Liora Harel, Israel; Luca Cantarini, Italy; Lütfi Akyol, Turkey; Maka Ioseliani, Georgia; Marco Cattalini, Italy; Marco Gattorno, Italy; Mareike Lieber, Germany; Maria Alessio, Italy; Maria Trachana, Greece; Merav Lidar, Israel; Michael Rosenbaum, Israel; Norbert Blank, Germany; Omer Karadag, Turkey; Philip Hawkins, UK; Philip J. Hashkes, Israel; Pierre Quartier, France; R.M. Laxer, Canada; Riva Brik, Israel; Romina Gallizzi, Italy; Segundo Bujan Rivas, Spain; Seza Ozen, Turkey; Sezin Yuce, Turkey; Shay Padeh, Israel; Stankovic Stojanovic, Katia, France; Stephen E. Goldfinger, USA; Steven J. Spalding, USA; Sulaiman Al-Mayouf, Saudi Arabia; Susan Nielsen, Denmark; Terri I. Getzug, USA; Tilmann Kallinich, Germany; Troels Herlin, Denmark; Wafaa Sewairi, Saudi Arabia; Y Berkun, Israel; Yehudit Barash, Israel; Yelda Bilginer, Turkey;

Funding: This study funded by the EULAR, Grand no; CLI071
